# Supplementary material
Source: publisher site journal article supplement (https://www.dovepress.com/article/225388)
Supplement: Supplementary file 1 [file get_supplementary_file.php]

**Predicted number of patients in various models of CAPD, HD and KT**

| Year | CAPD | | | HD | | | KT | | |
| --- | --- | --- | --- | --- | --- | --- | --- | --- | --- |
| (0,1,1) | (0,1,0) | %difference | (0,1,0) | (0,1,1) | %difference | (0,1,1) | (0,1,0) | %difference |
| 2018 | 21,912 | 21,908 | 0.02 | 16,620 | 16,618 | 0.01 | 27 | 15 | 44 |
| 2019 | 24,019 | 24,011 | 0.03 | 18,274 | 18,272 | 0.01 | 28 | 17 | 39 |
| 2020 | 26,215 | 26,113 | 0.39 | 19,928 | 19,926 | 0.01 | 30 | 18 | 40 |
| 2021 | 28,233 | 28,216 | 0.06 | 21,583 | 21,580 | 0.01 | 32 | 20 | 38 |
| 2022 | 30,340 | 30,319 | 0.07 | 23,236 | 23,234 | 0.01 | 33 | 21 | 36 |
| 2023 | 32,446 | 32,422 | 0.07 | 24,891 | 24,888 | 0.01 | 35 | 23 | 34 |
| 2024 | 34,553 | 34,525 | 0.08 | 26,545 | 26,541 | 0.01 | 36 | 24 | 33 |
| 2025 | 36,660 | 36,627 | 0.09 | 28,199 | 28,195 | 0.01 | 38 | 26 | 32 |
| 2026 | 38,767 | 38,730 | 0.09 | 29,854 | 29,849 | 0.02 | 40 | 27 | 33 |
| 2027 | 40,874 | 40,833 | 0.10 | 31,508 | 31,503 | 0.02 | 41 | 29 | 29 |
| % average growth rate | 7.2 | 7 | - | 7.4 | 7 | - | 4.8 | 7.6 | - |

**Abbreviations:** CAPD, continuous ambulatory peritoneal dialysis; HD, hemodialysis; KT, kidney transplant.
